1 **TITLE:**

2 **Attack behaviour in naïve Gyrfalcons is modelled by the same guidance law as in**  
3 **Peregrines, but at a lower guidance gain**

4  
5 **RUNNING TITLE:**

6 Attack behaviour in Gyrfalcons

7  
8 **AUTHORS AND AFFILIATIONS:**

9 Caroline H. Brighton<sup>1</sup>, Katherine E. Chapman<sup>2</sup>, Nicholas C. Fox<sup>3</sup>, and Graham K. Taylor<sup>1</sup>

10

11 <sup>1</sup>Department of Zoology, University of Oxford, OX1 3SZ, UK.

12 <sup>2</sup>Centre for Research in Animal Behaviour, School of Psychology, University of Exeter, EX4  
13 4QG, UK.

14 <sup>3</sup>Wingbeat Ltd, Carmarthen, SA33 5YL, UK.

15

16 **CORRESPONDING AUTHORS:**

17 graham.taylor@zoo.ox.ac.uk

18 caroline.brighton@zoo.ox.ac.uk

19

20 **KEYWORDS:** guidance law, optimal guidance, proportional navigation, proportional pursuit,  
21 *Falco rusticolus*, *Falco peregrinus*

22

23 **SUMMARY STATEMENT:** Naïve Gyrfalcons attacking aerial targets are modelled by the  
24 same proportional navigation guidance law as Peregrines, but with a lower navigation  
25 constant that promotes tail-chasing rather than efficient interception.

26

## 27 **ABSTRACT**

28

29 The aerial hunting behaviours of birds are strongly influenced by their flight morphology and  
30 ecology, but little is known of how this variation relates to the behavioural algorithms guiding  
31 flight. Here we use onboard GPS loggers to record the attack trajectories of captive-bred  
32 Gyrfalcons (*Falco rusticolus*) during their maiden flights against robotic aerial targets, which  
33 we compare to existing flight data from Peregrines (*Falco peregrinus*). The attack trajectories  
34 of both species are modelled most economically by a proportional navigation guidance law,  
35 which commands turning in proportion to the angular rate of the line-of-sight to target, at a  
36 guidance gain  $N$ . However, Gyrfalcons operate at significantly lower values of  $N$  than  
37 Peregrines, producing slower turning and a longer path to intercept. Gyrfalcons are less agile  
38 and less manoeuvrable than Peregrines, but this physical constraint is insufficient to explain  
39 their lower guidance gain. On the other hand, lower values of  $N$  promote the tail-chasing  
40 behaviour that is typical of wild Gyrfalcons, and which apparently serves to tire their prey in a  
41 prolonged high-speed pursuit. Moreover, during close pursuit of fast evasive prey such as  
42 Ptarmigan (*Lagopus* spp.), proportional navigation will be less prone to being thrown off by  
43 erratic target manoeuvres if  $N$  is low. The fact that low-gain proportional navigation  
44 successfully models the maiden attack flights of Gyrfalcons suggests that this behavioural  
45 algorithm is embedded in a hardwired guidance loop, which we hypothesise is ancestral to the  
46 clade containing Gyrfalcons and Peregrines.

47

48

## 49 **INTRODUCTION**

50

51 Raptorial feeding is a complex mode of foraging behaviour, the success of which hinges on  
52 intercepting a target whose own success hinges on evading capture. Aerial pursuit in particular  
53 is one of the most challenging behaviours that organisms perform, but also one of the simplest  
54 to characterise. A dyadic interaction, for example, is minimally described by the trajectories of  
55 a pair of interacting particles representing the predator and its prey. This level of description  
56 lends itself to an algorithmic approach, in which a mathematical rule – in this case, a particular  
57 kind of behavioural algorithm known as a guidance law – is used to connect sensory input to  
58 motor output (Hein et al. 2020). As there are only a limited number of ways in which one  
59 particle can be steered to intercept another, this algorithmic approach lends itself in turn to a

60 rigorous comparative analysis of behaviour across different taxa, locomotor modes, and  
61 spatiotemporal scales. Key research questions include: What sensory information is used to  
62 guide interception, and how? For what function is the attacker's guidance algorithm optimized?  
63 And how is this behavioural algorithm acquired? Here we address these questions for a sample  
64 of naïve Gyrfalcons (*Falco rusticolus*), which are the largest of all falcons, and hence one of  
65 the largest extant predators specialising in aerial interception.

66

67 Gyrfalcons are closely related to Peregrines (*Falco peregrinus*), whose attack trajectories are  
68 well modelled (Brighton et al. 2017) by a guidance law called proportional navigation (PN). A  
69 pure PN guidance law commands turning at an angular rate  $\dot{\gamma} = N\dot{\lambda}$ , where  $\dot{\lambda}$  is the angular  
70 rate of the attacker's line-of-sight to target, and where the guidance gain  $N$  is called the  
71 navigation constant and assumed to be fixed within an attack. In contrast, the attack trajectories  
72 of Harris' Hawks (*Parabuteo unicinctus*) are best modelled by a mixed PN+PP guidance law,  
73  $\dot{\gamma} = N\dot{\lambda} - K\delta$ , which combines a PN element with a proportional pursuit (PP) element,  $-K\delta$ ,  
74 commanding turning in proportion to the deviation angle  $\delta$  between the attacker's velocity  
75 vector and its line-of-sight to target (Brighton and Taylor 2019). In this case, a PN+PP guidance  
76 law with guidance constants  $N = 0.7$  and  $K = 1.2 \text{ s}^{-1}$  modelled the observed flights more  
77 closely than a PN or PP guidance law in which  $N$  or  $K$  was allowed to vary between flights  
78 (Brighton and Taylor 2019). The PN guidance law of Peregrines promotes short-cutting  
79 towards the eventual point of intercept, making it well suited to intercepting non-maneuvring  
80 targets in open environments (Brighton et al. 2017). In contrast, the PN+PP guidance law of  
81 Harris' Hawks promotes tail-chasing directly after the target, making it better suited to close  
82 pursuit through potentially cluttered environments (Brighton and Taylor 2019). Hawks  
83 (Accipitridae) and falcons (Falconidae) are thought to have diverged >60 mya (Jarvis et al.  
84 2014; Prum et al. 2015), so we would naturally expect the attack behaviour of Gyrfalcons to  
85 be better modelled by the PN guidance law of Peregrines than by the PN+PP guidance law of  
86 Harris' Hawks.

87

88 Peregrines and Gyrfalcons are both adapted to open environments, hunting mainly avian prey,  
89 which may be knocked down in flight (Garber et al. 1993), struck on the ground before taking  
90 flight (Bengtson 1971), or forced to the ground after a long chase (Cade 1982; Woodin 1967).  
91 However, whereas Peregrines will often dive from altitude in a high-speed stoop (Cresswell  
92 1996), Gyrfalcons rarely stoop in the wild and almost always hunt close to the ground (Cade

93 1982; Garber et al. 1993). Gyrfalcons are most often recorded performing low surprise attacks  
94 initiated from a perch or from ridge soaring (Cade 1982; Garber et al. 1993; Potapov and Sale  
95 2005; White 1991; White and Weeden 1966), but if not immediately successful then they will  
96 commonly enter the prolonged tail-chase that is typical of this species (Cade 1982; Pennycuik  
97 et al. 1994). Similar hunting behaviours are also observed in Peregrines (Cresswell 1996), but  
98 the distinct speed advantage that Peregrines acquire when stooping (Mills et al. 2018; Mills et  
99 al. 2019) appears to be lacking in wild Gyrfalcons. Such variation in hunting behaviour may  
100 be expected to be associated with variation in the underlying guidance law.

101

102 Peregrine attacks are best modelled by a range of values of  $N$  (median: 2.6; 1<sup>st</sup>, 3<sup>rd</sup> quartiles:  
103 1.5, 3.2) lower than the interval  $3 \leq N \leq 5$  that is typical of missile applications, but close to  
104 the optimum minimizing total steering effort in the classical linear-quadratic formulation of the  
105 optimal guidance problem (Brighton et al. 2017). This theory predicts that  $N = 3 v_c / (v \cos \delta)$   
106 is optimal for attacks on non-maneuvring targets, where  $v_c$  is the speed at which the attacker  
107 closes range on its target, and  $v$  is the attacker's groundspeed (Shneydor 1998; Siouris 2004).  
108 In words, the optimal value of  $N$  is proportional to the ratio  $v_c / (v \cos \delta)$ , which expresses how  
109 effectively the attacker closes range on its target ( $v_c$ , representing the difference between the  
110 speed of the attacker's approach and the speed of the target's retreat) in relation to its own  
111 motion towards the target ( $v \cos \delta$ , representing the speed of the attacker's approach). Hence,  
112 whereas  $N = 3$  is optimal for attacks on stationary targets (where  $v_c = v \cos \delta$ ),  $N < 3$  is  
113 optimal for attacks on retreating targets (where  $v_c < v \cos \delta$ ), at a value which depends on the  
114 relative speeds of target and attacker. In a high-speed stoop, for instance, the target's speed  
115 may be negligible compared to that of its attacker, such that  $v_c / (v \cos \delta) \approx 1$  making  $N \approx 3$   
116 optimal (Mills et al. 2018; Mills et al. 2019). Conversely, in a prolonged tail chase in which  
117 the target flees at a similar speed to the attacker, much lower values of  $N < 3$  may be optimal.  
118 We therefore hypothesise that Gyrfalcons will use PN guidance to intercept targets but will do  
119 so using a lower value of  $N$  than Peregrines.

120

121

## 122 **METHODS**

123

124 To test these hypotheses, we use a combination of empirical measurements and computational  
125 modelling to identify the guidance law used by naïve captive-bred Gyrfalcons chasing robotic

126 aerial targets. Our observations were recorded on the first attack flights that the birds had ever  
127 made against aerial targets, and therefore reflect as closely as possible the hard-wired form of  
128 the underlying guidance algorithm, with no prior opportunity for reinforcement learning.

129

## 130 **Animals**

131

132 We observed 23 naïve captive-bred Gyrfalcons, comprising 19 pure Gyrs (*F. rusticolus*) and 4  
133 Gyr-Saker hybrids ( $7/8^{\text{th}}$  *F. rusticolus*  $\times$   $1/8^{\text{th}}$  *F. cherrug*), chasing robotic aerial targets during  
134 their first flight sessions. This sample contained only naïve first-year birds that had not  
135 previously flown after aerial targets, except for during a single flight against a swung lure  
136 immediately beforehand. This work has received approval from the Animal Welfare and  
137 Ethical Review Board of the Department of Zoology, University of Oxford in accordance with  
138 University policy on the use of protected animals for scientific research, permit no.  
139 APA/1/5/ZOO/NASPA, and is considered not to pose any significant risk of causing pain,  
140 suffering, damage or lasting harm to the animals.

141

## 142 **Experimental protocol**

143

144 Flight trials were carried out on open moorland at Watch Hill, Wealside Farm,  
145 Northumberland, UK, in winds gusting from 4 to 7 m·s<sup>-1</sup>. The birds were recorded chasing a  
146 remotely piloted, ducted fan “Roprey” model with a food reward strapped to its dorsal surface  
147 (Wingbeat Ltd, Carmarthen, Wales, UK; Fig. 1). Each bird carried a BT-Q1300 GPS receiver  
148 (QStarz International, Taipei, Taiwan) logging position and groundspeed at 5 Hz. The GPS  
149 receiver was carried dorsally on a Trackpack harness (Marshall Radio Telemetry, Salt Lake  
150 City, UT, USA), giving a total load of 0.015 kg. An identical GPS logger was fixed inside the  
151 body compartment of the Roprey, and the flights were filmed using a handheld Lumix DMC-  
152 FZ1000 camera recording 4k video at 25 frames s<sup>-1</sup> (Panasonic Corporation, Osaka, Japan).  
153 Each flight trial began as the falconer unhooded the bird on their fist, with the Roprey held ~20  
154 m upwind. The Roprey was launched as soon as the bird took off, or sometimes just  
155 beforehand; if not caught immediately (see e.g. Fig. 2A), it was flown through a series of  
156 evasive turns (see e.g. Fig. 2B). The trial ended when the bird first intercepted the Roprey. If  
157 the bird knocked the Roprey with its talons, then the pilot brought it safely to the ground; if the  
158 bird bound to the Roprey, then the motor was cut, and an airbrake was deployed to prevent the

159 pair from drifting. In a few cases, the Roprey crash-landed before finally being intercepted by  
160 the bird. After disregarding 3 flights in which the bird did not intercept the target, and another  
161 7 flights in which the GPS logger was lost during the session, we were left with an initial  
162 sample of 28 flights from 19 naïve Gyrfalcons.

163

#### 164 **Data synchronization and error analysis**

165

166 We used the GPS time signal to synchronize the two GPS data streams to within  $\pm 0.1$  s, having  
167 linearly interpolated a small number of dropped datapoints. We matched the synchronized GPS  
168 data to the video with reference to take-off and landing, and used the video to identify the time  
169 of first intercept. We then shifted the entire GPS trajectory of the bird so as to match its  
170 estimated position at first intercept to that of the target (Fig. 2). This adjustment was necessary  
171 to remove positional bias due to GPS receiver clock error, which is such that at the nominal  
172 horizontal positioning accuracy of our GPS receivers ( $<3.0$  m circular error probable), we  
173 would expect 50% of position estimates of a co-located pair of receivers to be separated by  
174  $\geq 4.8$  m under an isotropic gaussian error model. Receiver clock error varies slowly once settled,  
175 so has no significant effect on the measurement of changes in position over short timescales:  
176 in fact, we have shown empirically that our receivers have a precision of order 0.1 m for  
177 changes in position occurring over intervals of order 10 s (Brighton et al. 2017). Even so, there  
178 were 8 flights for which the discrepancy in the horizontal position estimates of the bird and  
179 target at intercept exceeded the 95<sup>th</sup> percentile expected at the nominal accuracy of the  
180 receivers, which indicates a higher-than-expected positioning error in one or both receivers. Of  
181 these 8 flagged flights, 5 were the first flight that we recorded after receiver start-up at the  
182 beginning of a logging session, which suggests that the receiver clock estimate had not been  
183 given sufficient time to settle at the start of all 7 logging sessions (Fisher's exact test:  $p =$   
184 0.01). We therefore dropped these 8 flagged flights from the analysis, leaving a final sample  
185 of 20 flights by  $n = 13$  Gyrfalcons (Table S1). Among these 20 remaining flights, the  
186 discrepancies in the position estimates of bird and target at intercept (median: 5.5 m; IQR: 8.0-  
187 3.1 m) were distributed as expected at the nominal accuracy of the receivers (median: 4.8m;  
188 IQR: 7.3-2.8 m), albeit with no extreme outliers.

189

#### 190 **Trajectory modelling**

191

192 We simulated the birds' measured flight trajectories in MATLAB, by predicting their turn rate  
193  $\dot{\gamma}(t)$  in response to the target's measured trajectory using a guidance law of the form:

194

$$\dot{\gamma}(t) = N\dot{\lambda}(t) - K\delta(t) \quad (1)$$

195 where  $\dot{\lambda}(t)$  is the angular rate of the line-of-sight to target, where  $\delta(t)$  is the deviation angle  
196 between the target and the attacker's velocity vector, and where  $N$  and  $K$  are constants. Angles  
197 and angular rates are defined in vector form in the three-dimensional (3D) case, but can be  
198 treated as scalars in the two-dimensional (2D) case. Eq. 1 necessarily ignores the effects of any  
199 sensorimotor delay, on the basis that this is expected to be comparable to the  $\pm 0.1$  s uncertainty  
200 in the synchronization of the GPS data streams; see (Brighton and Taylor 2019). In the special  
201 case that  $K = 0$ , Eq. 1 reduces to a pure PN guidance law, whereas in the special case that  $N =$   
202  $0$ , Eq. 1 reduces to a pure PP guidance law. We refer to the general case in which  $K \neq 0$  and  
203  $N \neq 0$  as mixed PN+PP guidance. We used a forward Euler method to simulate each flight  
204 under either PN, PP, or PN+PP guidance, initializing the simulation using the bird's measured  
205 position and velocity at some given start point, and matching the bird's simulated flight speed  
206 to its known groundspeed. The method is described further in our work with Peregrines and  
207 Harris' Hawks (Shneydor 1998; Siouris 2004), the only difference being the  $1/3000^{\text{th}}$  s step  
208 size that was used here to ensure that all parameter estimates were accurate at the reported  
209 precision (for simulation code, see Supporting Data S1).

210

211 We used a Nelder-Mead simplex algorithm to find the value of  $N$  and/or  $K$  that minimized the  
212 mean prediction error for each flight, defined as the mean absolute distance between the  
213 measured and simulated trajectories. However, because the bird did not always start chasing  
214 the target from the moment it was launched, it was necessary to select the start-point of the  
215 simulation by reference to the data. Following the same approach used to model aerial chases  
216 in Peregrines (Brighton et al. 2017), we therefore ran simulations beginning from all possible  
217 start times  $\geq 2.0$  s before intercept, reporting the longest 2D simulation (up to a maximum of  
218 20 s) for which the mean prediction error was  $\leq 1.0\%$  of the flight distance modelled. For the  
219 3D case, we used an equivalent error tolerance of 1.2%, to preserve the same tolerance in each  
220 dimension. This process of selecting the start-point of each simulation by reference to the  
221 model's performance on the data is objective, but risks capitalizing on chance. We ensure that  
222 our inferences are robust to the associated risk of overfitting by making contrastive inferences

223 between alternative guidance models and by focussing our inferences on the population  
224 properties of the estimated parameters. Simulations that failed to model  $\geq 2.0$  s of flight at the  
225 specified error tolerance are recorded as unsuccessful, and their parameter estimates are not  
226 reported. Hence, because all of the successful simulations were fitted to within the same  
227 specified error tolerance, the appropriate figure of merit for each simulation is the overall  
228 distance or duration of flight modelled, expressed relative to the number of estimated guidance  
229 parameters.

230

231 To facilitate direct comparison with our published results from experienced Peregrines  
232 (Brighton et al. 2017), we reanalysed the Peregrine dataset using exactly the same methods  
233 described above. After excluding 33 flights representing attacks on stationary ground targets,  
234 and after dropping another 9 flights that were flagged as having lower-than-expected accuracy  
235 at the point of intercept by the method above, this yielded a refined sub-sample of 13 flights  
236 against aerial targets made by 4 experienced Peregrines (*F. peregrinus*). The mixed PN+PP  
237 guidance law was not considered in the original analysis (Brighton et al. 2017), so was fitted  
238 for the first time here. The only other difference from the original analysis was the refinement  
239 of the integration step size used here. This had only a small effect on the simulated trajectories,  
240 but sometimes caused a different start-point to be selected for the simulations, because of the  
241 thresholding associated with finding the longest simulation fitted at the specified error  
242 tolerance.

243

244

## 245 **RESULTS**

246

### 247 **The attack trajectories of naïve Gyrfalcons are well modelled under PN**

248

249 The 2D simulations under PN successfully modelled 18/20 of the flights by naïve Gyrfalcons,  
250 fitting 1127 m and 111.0 s of flight at 1.0% error tolerance (Figs. 2A-B, 3, S1; Table S2). In  
251 contrast, the PP simulations modelled only 14/20 flights successfully, fitting 824 m and 77.4 s  
252 of flight, for the same number of estimated guidance parameters (Fig. 3A-B; Table S2). PN is  
253 therefore much the better supported of the two pure guidance laws. In contrast, the PN+PP  
254 simulations successfully modelled the terminal phase of all 20 flights, fitting 1358 m and 139.4  
255 s of flight at 1.0% error tolerance (Fig. 3A-B; Table S2). The addition of a PP term therefore  
256 increased the duration of flight fitted by a factor of 1.3 relative to PN, for a doubling in the



257 number of estimated guidance parameters. It follows that the Gyrfalcons' attack trajectories  
258 are more economically modelled by PN than by PN+PP.

259

260 The implied overfitting of the PN+PP simulations is further evidenced by the observation that  
261 the parameter estimates for  $K$  were inconsistently signed in the PN+PP simulations (median  
262  $K$ :  $0.2 \text{ s}^{-1}$ ; 1<sup>st</sup>, 3<sup>rd</sup>, quartiles:  $-0.2, 0.7 \text{ s}^{-1}$ ; sign test:  $p = 0.26$ ;  $n = 20$  flights; Fig. 3D), despite  
263 being positive in most of the successful PP simulations (median  $K$ :  $0.9 \text{ s}^{-1}$ ; 1<sup>st</sup>, 3<sup>rd</sup> quartiles:  
264  $0.2, 1.7 \text{ s}^{-1}$ ; sign test:  $p = 0.01$ ;  $n = 14$  flights; Fig. 3D). This volatility in the sign of the  
265 parameter estimates for  $K$  indicates that any turning behaviour that is not already modelled by  
266 the PN element of the PN+PP simulations is not being consistently modelled by their PP  
267 element either, so is likely to represent noise. Hence, given that  $K > 0$  steers flight towards the  
268 target, whereas  $K < 0$  steers flight away from it, there is no evidence to indicate that a PP  
269 element supplements PN in commanding steering towards the target. Conversely, the  
270 observation that the parameter estimates for  $N$  were almost always positive in the successful  
271 PN simulations (median  $N$ : 1.2; 1<sup>st</sup>, 3<sup>rd</sup> quartiles: 0.5, 1.4; sign test:  $p < 0.001$ ;  $n = 18$  flights;  
272 Fig. 3C), and were similar in the PN+PP simulations (median  $N$ : 1.1; 1<sup>st</sup>, 3<sup>rd</sup> quartiles: 0.5, 1.5;  
273 sign test:  $p = 0.003$ ;  $n = 20$  flights; Fig. 3C), provides strong positive evidence that steering  
274 towards the target is indeed based on feeding back the line-of-sight rate  $\dot{\lambda}$  rather than the  
275 deviation angle  $\delta$ .

276

277 Several of the successful PN simulations had parameter estimates  $N \ll 1$ , so predict little  
278 turning behaviour at all (Fig. 4). These simulations provide no positive evidence for feedback  
279 of  $\dot{\lambda}$ , but all 4 simulations with values of  $N$  falling below the 1<sup>st</sup> quartile correspond to nearly  
280 straight sections of flight (Fig. 4D,K,L,N), for which there is little turning behaviour to explain,  
281 and for which parameter estimation is therefore unreliable. Conversely, all 11 simulations with  
282 values of  $N$  falling between the 1<sup>st</sup> and 3<sup>rd</sup> quartiles were from flights involving a substantial  
283 amount of horizontal turning (Figs. 4C,E-I,M,O-R), which proportional feedback of  $\dot{\lambda}$   
284 successfully explains. To check whether PN guidance could also capture the altitudinal  
285 component of the Gyrfalcons flights, we re-fitted all of the PN simulations in 3D (Fig. 5).  
286 Although the number of flights that could be modelled successfully under PN dropped to 12/20  
287 in 3D, comprising 734 m and 69.4 s of flight fitted at 1.2% error tolerance, the parameter  
288 estimates in the  $n = 12$  successfully-fitted 3D simulations (median  $N$ : 1.0; 1<sup>st</sup>, 3<sup>rd</sup> quartiles:  
289 0.2, 1.4) were similar to those of the same flights in 2D (median  $N$ : 1.2; 1<sup>st</sup>, 3<sup>rd</sup> quartiles: 0.6,

290 1.8), and were not significantly higher or lower in either case (sign test:  $p = 0.39$ ). We  
291 therefore focus the remainder of our reporting on the 2D simulations.

292

### 293 **PN models both short dashes and extended chases in their terminal phase**

294

295 The 20 Gyrfalcon flights comprised 10 short dashes lasting from 3 to 7 s (Fig. 4A-I), and 10  
296 extended chases lasting from 18 to 223 s (Fig. 4J-R). Typically, these short dashes correspond  
297 to the birds' maiden flights (Table S1), whereas the extended chases correspond to their second  
298 flights (Table S1), which is because the pilot made less of an attempt to evade capture on the  
299 maiden flight. We found no evidence of any systematic increase or decrease in the parameter  
300 estimates for  $N$  between the Gyrfalcons' maiden and second flights, for the small subsample  
301 of  $n = 6$  individuals for which paired data was available (sign test:  $p = 0.69$ ). Of the 10 short  
302 dashes, 7 were modelled successfully from target launch to intercept (Fig. 4A-G), whilst 2 were  
303 modelled successfully for two-thirds of the total distance flown (Fig. 4H,I). For the 9/10  
304 extended chases that were modelled successfully (Fig. 4J-R), the simulations only captured the  
305 terminal phase of the attacks (median duration fitted: 8.2 s; first, third quartiles: 3.1, 12.3 s).  
306 This nevertheless represents a substantial amount of flight fitted by distance (median distance  
307 fitted: 86.9 m; first, third quartiles: 19.9 m, 146.5 m), because of the high speeds reached by  
308 the end of a chase.

309

### 310 **Naïve Gyrfalcons operate at lower navigation constants than experienced Peregrines**

311

312 All 13 flights recorded previously from experienced Peregrines (Brighton et al. 2017) were  
313 modelled successfully in 2D under PN or PN+PP (Fig. S2; Table S3), whereas only 11/13 of  
314 these flights were modelled successfully under PP (Table S3). Moreover, whereas the PN  
315 simulations fitted 1517 m and 99.6 s of flight at 1.0% error tolerance, the PP simulations fitted  
316 only 927 m and 57.8 s of flight, for the same number of estimated guidance parameters (Table  
317 S3). This confirms our earlier finding (Brighton et al. 2017) that PN is the better supported of  
318 the two pure guidance laws in Peregrines. In comparison, the simulations under PN+PP fitted  
319 1740 m and 131.2 s of flight successfully at 1.0% error tolerance (Table S3). The addition of a  
320 PP term to the PN model for Peregrines therefore increased the duration of flight fitted by a  
321 factor of 1.3, but for a doubling in the number of estimated guidance parameters. It follows that

322 the Peregrines' attack trajectories are more economically modelled by PN than by PN+PP,  
323 which is the same conclusion as we have reached above for the Gyrfalcons.

324

325 The parameter estimates for  $N$  in the Gyrfalcons (median  $N$ : 1.2; 1<sup>st</sup>, 3<sup>rd</sup> quartiles: 0.5, 1.4)  
326 were systematically lower (Fig. 6) than those in the Peregrines (median  $N$ : 2.8; 1<sup>st</sup>, 3<sup>rd</sup> quartiles:  
327 1.6, 3.1). This difference was statistically significant (Mood's median test), both when treating  
328 repeated measures from the same individual as independent datapoints ( $\chi^2(1, n = 31) = 7.30$ ;  
329  $p = 0.007$ ), and when analysing only the median values of  $N$  for each individual to eliminate  
330 pseudo-replication ( $\chi^2(1, n = 16) = 5.33$ ;  $p = 0.02$ ). The statistically significant difference  
331 in the distribution of  $N$  between the two species has a profound effect on the chase dynamics,  
332 as can be shown by simulating the intercept trajectories that the Gyrfalcons would have  
333 followed had they used the median value of  $N$  for the Peregrines, and *vice versa* (Fig. 7). It is  
334 clear by inspection that the Gyrfalcons would have intercepted the target sooner had they  
335 followed the trajectory commanded at  $N = 2.8$  typical of Peregrines, and conversely that the  
336 Peregrines would not have intercepted the target as soon as they did had they followed the  
337 trajectory commanded at  $N = 1.2$  typical of Gyrfalcons. This begs the question of why the  
338 Gyrfalcons operated at such low values of  $N$ , which we tackle from various perspectives in the  
339 Discussion, having first considered our key findings and their limitations.

340

341

## 342 **DISCUSSION**

343

### 344 **Key scientific findings and their limitations**

345

346 There are two key findings of this work: first, that naïve Gyrfalcons chase aerial targets as if  
347 using the same PN guidance law found previously in experienced Peregrines (Brighton et al.  
348 2017); and second, that they do so at a lower value of the navigation constant  $N$  (Fig. 3). The  
349 first of these key findings is robustly confirmed by showing that PN models the data more  
350 successfully than PP and more economically than PN+PP. It is plausible that the data might be  
351 even better modelled by some alternative guidance law that we have not yet tested, but as there  
352 are only a limited number of variables that can be fed back to command steering in a particle  
353 model of interception, we think it likely that any such guidance law would be a variant of PN.  
354 The second of these key findings is robustly confirmed using non-parametric statistics that

355 demonstrate a systematic difference in the navigation constant  $N$  between the Gyrfalcons  
356 (median  $N$ : 1.2; 1<sup>st</sup>, 3<sup>rd</sup> quartiles: 0.5, 1.4) and the Peregrines (median  $N$ : 2.8; 1<sup>st</sup>, 3<sup>rd</sup> quartiles:  
357 1.6, 3.1) for identically-analysed data collected using identical GPS loggers. Its primary  
358 limitations are first that the experiments with Peregrines used a towed lure rather than a Roprey  
359 model, and second that the sample of Peregrines comprised only  $n = 4$  individuals. However,  
360 as we have previously reported similar navigation constants (median:  $N = 2.6$ ; 1<sup>st</sup>, 3<sup>rd</sup>  
361 quartiles: 1.7, 3.3) in an independent sample of  $n = 3$  experienced Peregrines attacking  
362 stationary targets (Brighton et al. 2017), we are confident that this result can be generalised.

363

### 364 **Technical limitations**

365

366 It is important to emphasise that we have not identified a unique navigation constant  $N$  for  
367 either species. Rather, we have identified distinct intervals within which their respective values  
368 of  $N$  typically fall. Moreover, whilst we have reported a unique estimate of  $N$  for each flight,  
369 a different parameter estimate would have been reported had a different start point been chosen  
370 for the simulation. The selected start points are those which maximise the amount of flight  
371 fitted at the specified error tolerance, and therefore represent an objective compromise between  
372 goodness of fit and amount of data modelled. It is uncertain how much of the variability in our  
373 parameter estimates for  $N$  is the result of measurement error as opposed to genuine behavioural  
374 flexibility. In particular, the use of GPS loggers recording speed and position at 5 Hz precludes  
375 perfect synchronization of the attacker and target trajectories and hence estimation of the  
376 sensorimotor delay, so it is plausible that data collected at higher spatiotemporal precision  
377 would show lower variability in the parameter estimates for  $N$ . Finally, our modelling only  
378 accounts for the influence of wind only insofar as the simulated groundspeed is matched to that  
379 of the measured groundspeed. The simulations therefore treat any distortions of the bird's track  
380 due to the wind as if these were produced by the attacker's own steering commands, although  
381 the effect of this is mitigated in close pursuit by the fact that the attacker and its target are  
382 subject to the same wind. Nevertheless, gusting winds might perhaps explain some of the more  
383 prominent inflections in the measured flight trajectories that are not captured by simulations  
384 fitted over longer distances (e.g. Fig. 4J) or at higher wind speeds (e.g. Fig. 4R).

385

### 386 **Physical and physiological constraints**

387

388 For a given line-of-sight rate, the higher values of  $N$  in Peregrines are expected to command  
389 turning at approximately twice the angular rate of the lower values of  $N$  in Gyrfalcons.  
390 Minimum turn radius scales linearly with wing loading,  $W$  (Taylor and Thomas 2014), which  
391 is  $\sim 6.0 \text{ kg m}^{-2}$  in Gyrfalcons compared to  $\sim 5.3 \text{ kg m}^{-2}$  in Peregrines (Pennycuick et al. 1994).  
392 Gyrfalcons are therefore expected to be less manoeuvrable than Peregrines, with a  $\sim 13\%$  larger  
393 minimum turn radius. They are also expected to be less agile, because flight speed scales as  
394  $W^{1/2}$  (Taylor and Thomas 2014), such that maximum turn rate scales as  $W^{-1/2}$ , and is  
395 therefore expected to be  $\sim 6\%$  lower in Gyrfalcons than Peregrines. In principle, this physical  
396 constraint could force the navigation constant  $N$  to be lower in Gyrfalcons, but the expected  
397 difference in their agility is too small to explain the twofold difference in  $N$  that we observe.  
398 Furthermore, there is no evidence that physical constraints on turning influenced the shape of  
399 the recorded trajectories. Rather than turning as tightly as possible on a circular arc, the birds  
400 instead followed a curved trajectory of increasing or decreasing radius, characteristic of the  
401 time history of turning commanded under PN guidance at higher or lower values of  $N$ ,  
402 respectively (Fig. 4). The observed flight trajectories are similarly inconsistent with an old  
403 hypothesis proposed by Tucker (Tucker 2000), who argued that the curved attack trajectories  
404 of falcons could be generated by steering so as to hold the target's image on the laterally  
405 directed central fovea of the left or right eye whilst holding the head in line with the body  
406 (Tucker et al. 2000). This constraint is expected to produce a trajectory in which the deviation  
407 angle  $\delta$  between the attacker's velocity and its line-of-sight to target is held constant at  
408 approximately  $\pm 40^\circ$ , but there is no evidence of this from the data (see Fig. 2; see also (Kane  
409 and Zamani 2014).

410

#### 411 **A functional account of the observed variation in navigation constant**

412

413 In principle, the variation in  $N$  within and between species (Fig. 6) might be explained as a  
414 behavioural response under linear-quadratic optimal guidance theory (Shneydor 1998; Siouris  
415 2004), which predicts an optimum value of  $N = 3 v_c / (v \cos \delta)$  for attacks on non-  
416 manoeuvring targets minimizing overall steering effort. In practice, the median values of the  
417 ratio  $v_c / (v \cos \delta)$  for each flight did not differ significantly between the two species  
418 ( $\chi^2(1, n = 31) = 1.55$ ;  $p = 0.21$ ), and nor were they significantly related to  $N$  in a bisquare  
419 robust regression controlling for species ( $t(28) = 0.46$ ;  $p = 0.69$ ). We therefore find no  
420 evidence that the statistically significant difference in the parameter estimates for  $N$  between

421 the Peregrines and Gyrfalcons reflects a direct functional response to variation in the rate at  
422 which they closed range on the target relative to their own approach speed. This conclusion is  
423 based on classical theory for non-manoeuving targets, and therefore takes no account of the  
424 target's manoeuvres. Nevertheless, the tortuosity of the lure's path, defined as its overall path  
425 length divided by the straight line distance from start to finish, was similar in the experiments  
426 with Peregrines (median tortuosity: 1.6; 1<sup>st</sup>, 3<sup>rd</sup> quartiles: 1.3, 2.4) and Gyrfalcons (median  
427 tortuosity: 1.7; 1<sup>st</sup>, 3<sup>rd</sup> quartiles: 1.3, 2.5), so we conclude that differences in target manoeuvres  
428 are unlikely to explain the variation in  $N$  that we observed between species. Even so, an  
429 identical target manoeuvre will produce a greater angular change in the line-of-sight vector the  
430 closer the attacker is to its target, thereby demanding a higher rate of turning under PN. This is  
431 important, because whereas the Gyrfalcons took off together with the target at a range of  $\sim 20$   
432 m, the Peregrines were launched separately and sometimes at a range of  $>100$  m. When  
433 operating at close range, PN guidance is less prone to being thrown off by erratic target  
434 manoeuvres if  $N$  is low (Brighton and Taylor 2019), so it is plausible that the lower values of  
435  $N$  found in the Gyrfalcons might reflect a behavioural response to their proximity to the target  
436 at the initiation of the attack.

437

#### 438 **An adaptive account of the observed variation in navigation constant**

439

440 A complementary adaptive argument can also be made at species level. Whereas Peregrines  
441 have a very flexible diet (Cade 1982), Gyrfalcons depend heavily on a single prey type, with  
442 Ptarmigan (*Lagopus* spp.) comprising 74% of the catch on average across 17 studies recording  
443 66,726 individual prey items over most of the Gyrfalcon's range (Nielsen and Cade 2017).  
444 Ptarmigan have a high wing loading of  $\sim 9.7$  kg m<sup>-2</sup> (Greenewalt 1962), which is  $\sim 62\%$  higher  
445 than that of a Gyrfalcon. They are therefore intrinsically fast fliers, with large flight muscles  
446 that provide rapid acceleration in an explosive take-off, and short wings that make them less  
447 well adapted to sustained aerobic flight (Pennycuick et al. 1994). The prolonged tail-chasing  
448 behaviour that is typical of Gyrfalcons (Cade 1982) is therefore thought to serve to tire their  
449 prey and allow capture (Pennycuick et al. 1994). Such behaviour is promoted by the low values  
450 of  $N$  found in Gyrfalcons (Fig. 7), because PN with a low navigation constant  $N \approx 1$   
451 commands turning at an angular rate  $\dot{\gamma}$  approximately equal to the line-of-sight rate  $\dot{\lambda}$ . Once a  
452 tail chase has been initiated, this will tend to keep the attacker flying behind its target, and will  
453 not tend to be thrown off too far by the erratic jinking manoeuvres that are characteristic of the

454 evasive flight of Ptarmigan and many other prey (Mills et al. 2018; Mills et al. 2019). The low  
455 values of  $N$  found in Gyrfalcons therefore make sense from an adaptationist perspective if the  
456 function of their PN guidance is to pursue the prey doggedly until it tires. This is in contrast to  
457 the higher values of  $N$  found in Peregrines, which make sense if the function of their PN  
458 guidance is to exploit the speed and manoeuvrability acquired through stooping in order to  
459 intercept prey quickly and efficiently (Mills et al. 2018; Mills et al. 2019).

460

### 461 **Evolutionary and ontogenetic implications**

462

463 We found no evidence that the value of  $N$  changed systematically between the Gyrfalcons'  
464 first and second flights, but it is reasonable to assume that they would have learned to tune their  
465 guidance over longer timescales. For example, although wild Gyrfalcons do not usually stoop,  
466 falconers commonly train captive birds to do so (Tucker et al. 1998), which implies a degree  
467 of flexibility in their guidance. Likewise, whereas naïve Gyrfalcons tend to fly directly at their  
468 prey, experienced birds seem to anticipate their prey's behaviour. Even so, our finding that the  
469 maiden attack flights of naïve Gyrfalcons are well modelled under PN guidance strongly  
470 suggests that this behavioural algorithm is embedded in a hardwired guidance loop. Moreover,  
471 the fact that the same form of guidance law models the attack flights of experienced Peregrines  
472 is consistent with the hypothesis that PN guidance is ancestral to the clade comprising the  
473 Peregrines and Hierofalcons, of which the Gyrfalcon is a member (Wink 2018). Formal  
474 confirmation of this hypothesis would require the same behavioural algorithm to be identified  
475 in another Hierofalcon, or in a close outgroup such as the Merlin or Hobby falcons, both of  
476 which specialise in aerial pursuit. Because PN guidance commands turning in proportion to the  
477 line-of-sight rate of the target, which is defined in an inertial frame of reference, we would  
478 expect any such birds using PN to share a common sensorimotor architecture that fuses sensory  
479 input from the visual and vestibular systems to obtain the line-of-sight rate, and that uses the  
480 resulting signal to generate motor commands to the flight muscles controlling the wings and  
481 tail. Alternatively, it is possible that the distant landscape might serve as a visual proxy for the  
482 inertial frame of reference in aerial hunters, with target motion being measured directly with  
483 respect to the visual background; see also (Kane and Zamani 2014). It would therefore be of  
484 particular interest to test whether PN guidance also models the attack behaviours of the more  
485 distantly related Kestrels, given their specialism on terrestrial prey with no distant visual  
486 background against which to assess prey motion.

487

488 **Acknowledgements**

489

490 We thank Jimmy Robinson and Tom Spink for falconry work, plus their interns, Adam Vacek,  
491 Sander Gielen, and Daniel Clark. We thank Remy Van Wijk and Matt Aggett for piloting the  
492 Roprey. We thank Barbro Fox for her hospitality, and Sofia Miñano Gonzalez for valuable  
493 comments on the manuscript.

494

495 **Author contributions**

496

497 CB, GT and NF conceived the study. All authors contributed to field experiments. CB analysed  
498 the GPS data. CB and GT performed statistical analysis and wrote the paper. All authors  
499 commented on and approved the final version of the manuscript.

500

501 **Competing interests**

502

503 CB, KC and GT declare no competing interests. NF is CEO of Wingbeat Ltd, which supplied  
504 and piloted the Roprey in this study.

505

506 **Funding**

507

508 This project has received funding from the European Research Council (ERC) under the  
509 European Union's Horizon 2020 research and innovation programme (Grant Agreement No.  
510 682501) to GKT.



511 **References**

512

513 Bengtson SA. 1971. Hunting methods and choice of prey of gyrfalcons *falco-rusticolus* at  
514 myvatn in northeast iceland. *Ibis*. 113(4):468-&.

515 Brighton CH, Taylor GK. 2019. Hawks steer attacks using a guidance system tuned for close  
516 pursuit of erratically manoeuvring targets. *Nat Commun*. 10.

517 Brighton CH, Thomas ALR, Taylor GK. 2017. Terminal attack trajectories of peregrine falcons  
518 are described by the proportional navigation guidance law of missiles. *P Natl Acad Sci*  
519 *USA*. 114(51):13495-13500.

520 Cade TJ. 1982. *The falcons of the world*. Ithaca, New York, USA.: Cornell University Press.

521 Cresswell W. 1996. Surprise as a winter hunting strategy in sparrowhawks *accipiter nisus*,  
522 peregrines *falco peregrinus* and merlins *f-columbarius*. *Ibis*. 138(4):684-692.

523 Garber CS, Mutch BD, Platt S. 1993. Observations of wintering gyrfalcons (*falco-rusticolus*)  
524 hunting sage grouse (*centrocercus-uropasianus*) in wyoming and montana USA. *J*  
525 *Raptor Res*. 27(3):169-171.

526 Greenewalt CH. 1962. Dimensional relationships for flying animals. *Smithsonian*  
527 *Miscellaneous Collections Smithsonian Institution*. 144.

528 Hein AM, Altshuler DL, Cade DE, Liao JC, Martin BT, Taylor GK. 2020. An algorithmic approach  
529 to natural behavior. *Curr Biol*. 30(11):R663-R675.

530 Jarvis ED, Mirarab S, Aberer AJ, Li B, Houde P, Li C, Ho SYW, Faircloth BC, Nabholz B, Howard  
531 JT et al. 2014. Whole-genome analyses resolve early branches in the tree of life of  
532 modern birds. *Science*. 346(6215):1320-1331.

533 Kane SA, Zamani M. 2014. Falcons pursue prey using visual motion cues: New perspectives  
534 from animal-borne cameras. *J Exp Biol*. 217(2):225-234.

535 Mills R, Hildenbrandt H, Taylor GK, Hemelrijk CK. 2018. Physics-based simulations of aerial  
536 attacks by peregrine falcons reveal that stooping at high speed maximizes catch  
537 success against agile prey. *Plos Comput Biol*. 14(4):e1006044.

538 Mills R, Taylor GK, Hemelrijk CK. 2019. Sexual size dimorphism, prey morphology and catch  
539 success in relation to flight mechanics in the peregrine falcon: A simulation study. *J*  
540 *Avian Biol*. 50(3).

- 541 Nielsen OK, Cade TJ. 2017. Gyrfalcon and ptarmigan predator-prey relationship. In: Anderson  
542 DL, McClure CJW, Franke A, editors. Applied raptor ecology: Essentials from gyrfalcon  
543 research. Boise, Idaho, USA: The Peregrine Fund.
- 544 Pennycuik CJ, Fuller MR, Oar JJ, Kirkpatrick SJ. 1994. Falcon versus grouse - flight adaptations  
545 of a predator and its prey. *J Avian Biol.* 25(1):39-49.
- 546 Potapov E, Sale R. 2005. The gyrfalcon. Yale University Press.
- 547 Prum RO, Berv JS, Dornburg A, Field DJ, Townsend JP, Lemmon EM, Lemmon AR. 2015. A  
548 comprehensive phylogeny of birds (aves) using targeted next-generation DNA  
549 sequencing. *Nature.* 526(7574):569-U247.
- 550 Shneydor NA. 1998. Missile guidance and pursuit: Kinematics, dynamics and control.  
551 Woodhead Publishing Limited.
- 552 Siouris GM. 2004. Missile guidance and control systems. Springer-Verlag.
- 553 Taylor GK, Thomas ALR. 2014. Evolutionary biomechanics: Selection, phylogeny, and  
554 constraint. *Ox Ecol Ev.*1-152.
- 555 Tucker VA. 2000. The deep fovea, sideways vision and spiral flight paths in raptors. *J Exp Biol.*  
556 203(24):3745-3754.
- 557 Tucker VA, Cade TJ, Tucker AE. 1998. Diving speeds and angles of a gyrfalcon (*falco rusticolus*).  
558 *J Exp Biol.* 201(13):2061-2070.
- 559 Tucker VA, Tucker AE, Akers K, Enderson HJ. 2000. Curved flight paths and sideways vision in  
560 peregrine falcons (*falco peregrinus*). *J Exp Biol.* 203(24):3755-3763.
- 561 White CM, and Nelson, R. W. 1991. Hunting range and strategies of tundra breeding peregrine  
562 and gyrfalcons observed from a helicopter. *J Raptor Res.* 25:49-62.
- 563 White CM, Weeden RB. 1966. Hunting methods of gyrfalcons and behavior of their prey  
564 (ptarmigan). *Condor.* 68(5):517-&.
- 565 Wink M. 2018. Phylogeny of falconidae and phylogeography of peregrine falcons. *Ornis*  
566 *Hungarica.* 26(2):27-37.
- 567 Woodin N. 1967. Observations on gyrfalcons (*falco rusticolus*) breeding near lake myvatn,  
568 iceland. *Raptor Research.* 14(4):97-124.
- 569

570 **Figures**

571

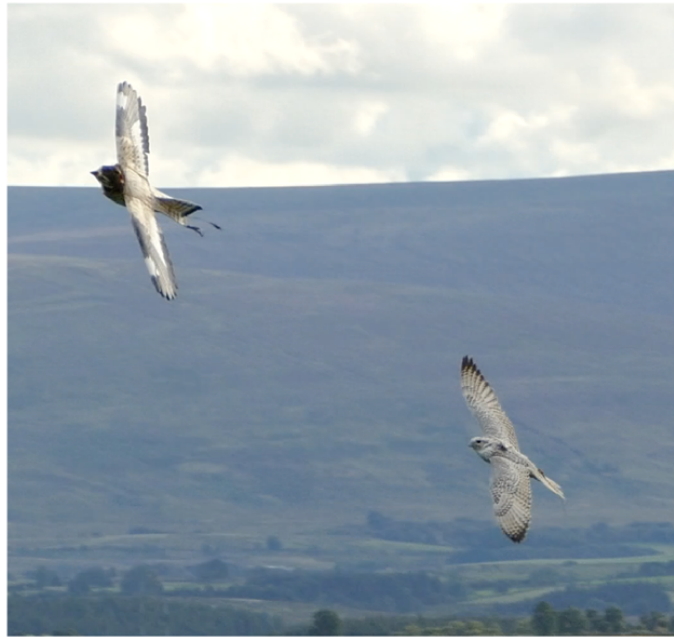

572

573

574 **Figure 1.** Cropped frame from video of a typical chase involving a Gyrfalcon and a “Rokarrowan” Roprey model.

575 Note the proximity of the attacker to its target, and their similar bank angles, which are characteristic of the tail-

576 chasing behaviour that we observed.

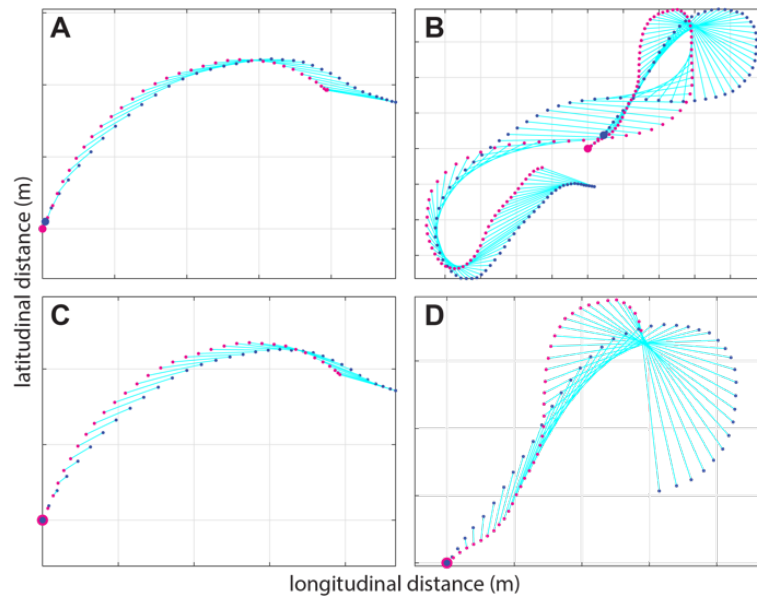

577

578

579 **Figure 2.** Two-dimensional (2D) GPS trajectories for: (A) the entirety of a short dash; and (B) the entirety of an  
580 extended chase, showing the lines-of-sight (cyan lines) between the Gyr Falcon (blue points) and Roprey (magenta  
581 points) at each sample point. Note the small discrepancy in the estimated position of target and attacker at the  
582 point of intercept (enlarged sample points), expected because of the positioning error associated with GPS  
583 receivers (see Methods). (C,D) The terminal phase of the same two flights (see Fig. 4G,M for modelling), after  
584 shifting the attacker's trajectory to correct for this positioning error. Gridlines at 10m spacing.

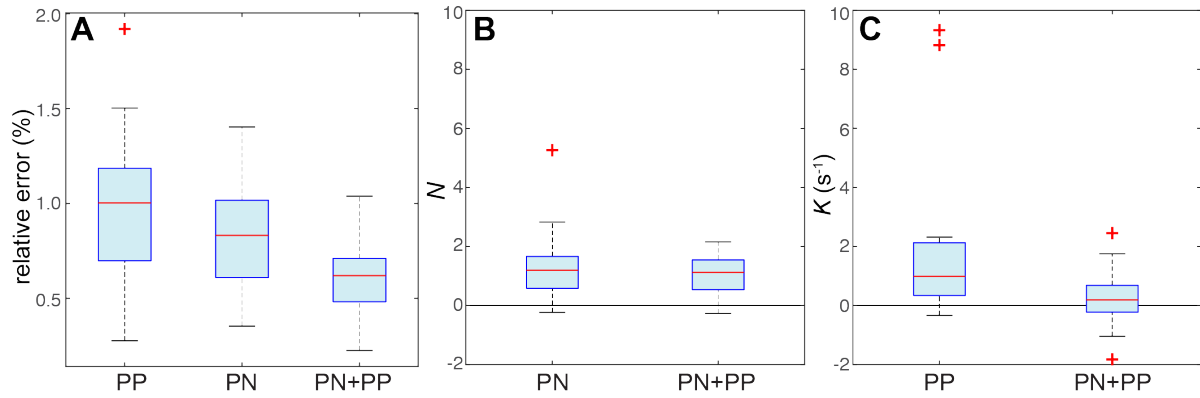

585

586 **Figure 3.** Box-and-whisker plots comparing model fits and parameter estimates for the 2D simulations of 20  
587 flights from  $n = 13$  Gyrfalcons under proportional pursuit (PP), proportional navigation (PN), and mixed  
588 (PN+PP) guidance. (A) Relative error of simulation, showing either the relative error for the longest simulation  
589 lasting  $\geq 2$  s that met the 1.0% error tolerance threshold for each flight, or if no simulation met this threshold, then  
590 the minimum relative error achieved on any simulation lasting  $\geq 2$  s. Note that whilst the PN+PP simulations fit  
591 the flights more closely than either PN or PP, they are almost certainly overfitted (see Results). (B,C) Parameter  
592 estimates for the guidance constants  $N$  and  $K$  for all successfully modelled flights. Note the variable sign of the  
593 parameter estimates for  $K$  under PN+PP, which confirms that these simulations are overfitted (one outlier for  
594 PN+PP not shown). The centre line of each box denotes the median for all flights; the lower and upper bounds of  
595 the box denote the 1<sup>st</sup> and 3<sup>rd</sup> quartiles; crosses indicate outliers falling  $>1.5$  times the interquartile range beyond  
596 the 1<sup>st</sup> or 3<sup>rd</sup> quartile; whiskers extend to the farthest datapoints not treated as outliers.

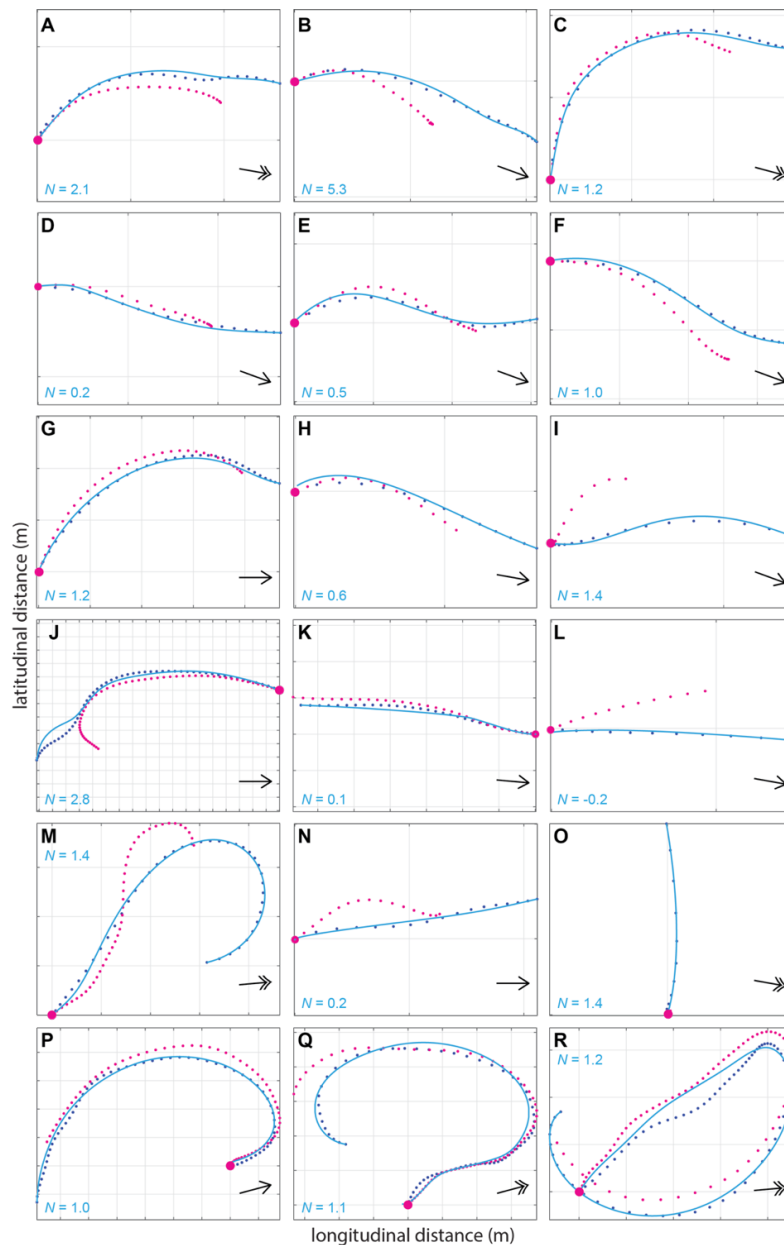

597

598

599 **Figure 4.** Two-dimensional (2D) attack trajectories for the 18/20 flights from  $n = 13$  Gyrfalcons that were  
600 successfully modelled under proportional navigation (PN) guidance. Panels show the measured trajectories of the  
601 target (magenta points) and attacker (blue points), overlain with the longest simulation fitted to within 1.0% error  
602 tolerance (blue lines) in 2D. The corresponding parameter estimate for  $N$  is displayed on each plot. Note that  
603 among the 9 short dashes (panels A-I), 7 flights (panels A-G) are modelled in their entirety from target launch to  
604 intercept; the other 9 flights (panels J-R) each correspond to the terminal phase of an extended chase. Simulations  
605 with values of  $N$  falling beneath the 1<sup>st</sup> quartile ( $N < 0.5$ ) coincide with nearly straight sections of flight (panels  
606 D,K,L,N), for which parameter estimation is unreliable. Simulations with values of  $N$  falling between the 1<sup>st</sup> and  
607 3<sup>rd</sup> quartiles ( $0.5 \leq N \leq 1.4$ ) involve a substantial amount of turning that the model successfully explains (panels  
608 C,E-I,M,O-R). Black arrows display mean wind direction; double headed arrows correspond to wind speeds  $> 20$   
609  $\text{km h}^{-1}$ ; gridlines at 10m spacing. See Fig. S1 for the remaining 2/20 flights that were not successfully modelled  
610 under PN.

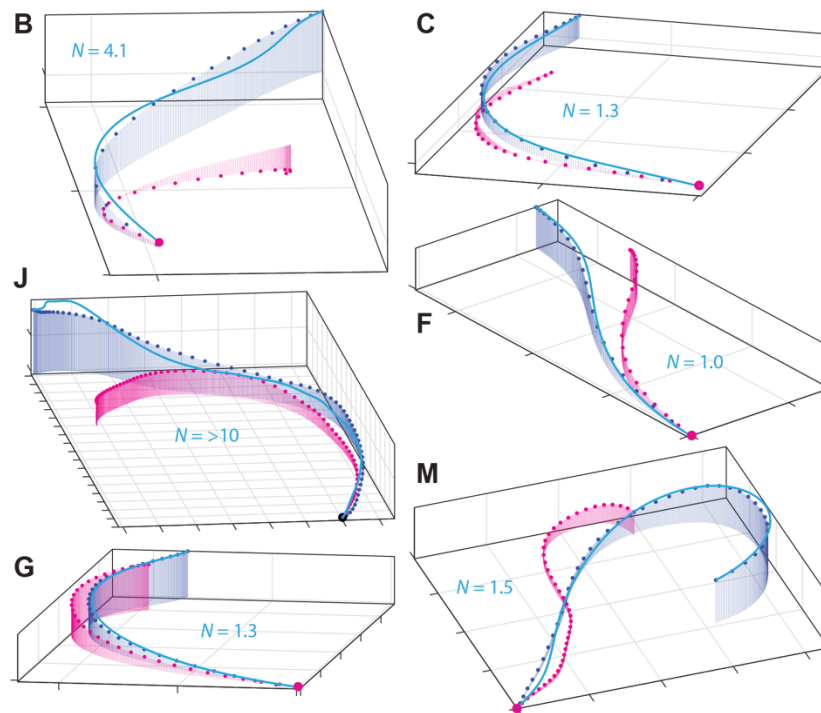

611  
612

613 **Figure 5.** Three-dimensional (3D) attack trajectories for the subset of 6 Gyrfalcon flights involving the greatest  
614 altitudinal change among the 12/20 that were successfully modelled under proportional navigation (PN) guidance.  
615 Panels show the measured trajectories of the target (magenta points) and attacker (blue points), overlain with the  
616 longest simulation fitted to within 1.2% error tolerance (blue lines) in 3D. The corresponding parameter estimate  
617 for  $N$  is displayed on each plot. Panels B, C, F, G correspond to short dashes for which almost the entire flight  
618 was modelled from target launch to intercept. Panel letters match those in Fig. 4; gridlines at 10m spacing.

619

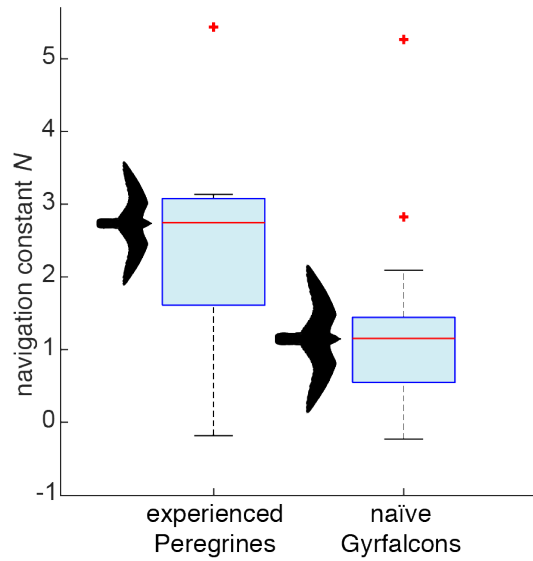

620

621 **Figure 6** Box-and-whisker plots comparing parameter estimates for  $N$  in proportional navigation (PN) guidance  
622 models fitted independently to the 13 attack flights from  $n = 4$  Peregrines, and 18 attack flights from  $n = 13$   
623 naïve Gyrfalcons; all in pursuit of manoeuvring targets. The centre line of each box denotes the median for all  
624 flights; the lower and upper bounds of the box denote the 1<sup>st</sup> and 3<sup>rd</sup> quartiles; crosses indicate outliers falling >1.5  
625 times the interquartile range beyond the 1<sup>st</sup> or 3<sup>rd</sup> quartile (one extreme outlier for the Peregrines not shown);  
626 whiskers extend to the farthest datapoints not treated as outliers.

627



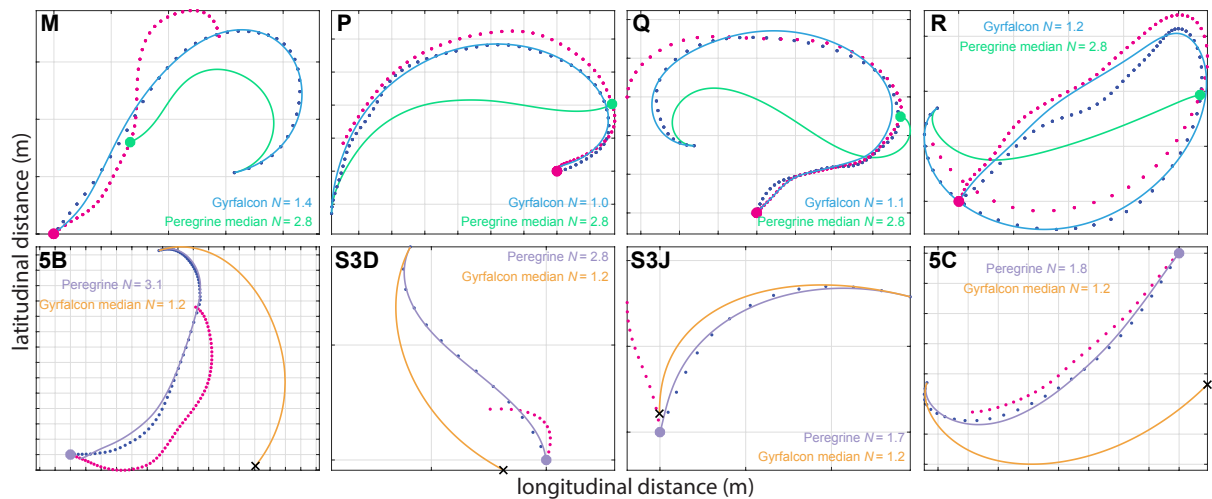

628

629

630 **Figure 7.** Effect of the navigation constant  $N$  on the dynamics of proportional navigation (PN) guidance. Upper

631 row: selection of 4 successfully modelled Gyrfalcon flights involving substantial turning, showing the measured

632 trajectory of the target (magenta dots) and attacker (blue dots) overlain with the best-fitting trajectory under PN

633 guidance at the value of  $N$  displayed on the panel (blue line), and with the trajectory that would have been followed

634 for the same initial conditions and target motion at the median value of  $N = 2.8$  for Peregrines (green

635 line). Green dot shows the predicted point of intercept had the Gyrfalcon used the median value of  $N$  for Peregrines; note that

636 this is always sooner than the actual point of intercept (magenta dot). Lower row: selection of 4 successfully

637 modelled Peregrine flights involving substantial turning, showing the measured trajectory of the target (magenta

638 dots) and attacker (blue dots) overlain with the best-fitting trajectory under PN guidance at the value of  $N$

639 displayed on the panel (lilac line), and with the trajectory that would have been followed for the same initial

640 conditions and target motion at the median value of  $N = 1.2$  for Gyrfalcons (orange line). Lilac dot shows the

641 actual point of intercept; black cross shows the predicted position of the bird had the Peregrine used the median

642 value of  $N$  for Gyrfalcons; note that this is always at some significant distance from the target. Panel letters match

643 those in Figs. 3, S2; gridlines at 10 m spacing.

644
